# Supplementary material for: Traditional healers’ role in the detection of active tuberculosis cases in a pastoralist community in Ethiopia: a pilot interventional study
Source: Springer Nature journal article supplement (doi:10.1186/s12889-019-7074-9), 2019-06-10
Supplement: MOESM1 [file 16787342]

# Supplementary: Questionnaire on post interventional assessments of traditional healers' knowledge regarding TB and Presumptive TB case referral practice

## Part I. Socio- demographic characteristics of the respondents

1. ID number of respondent \_\_\_\_\_
2. District \_\_\_\_\_ Kebele \_\_\_\_\_
3. Village \_\_\_\_\_ House No. \_\_\_\_\_
4. Sex : 1= Male 2= Female
5. Age (Year): \_\_\_\_\_
6. Ethnicity: 1= Oromo 2= Amhara 3=other (specify)  
\_\_\_\_\_
7. Religion 1= Muslim 2= Christianity 3= other specify  
\_\_\_\_\_
8. Marital status 1= Married 2= single 3 = divorced 4= widowed
9. Educational status: 1= can't read & write 2= read & write 3= primary (1-8) 4=  
secondary (9-12) 6= other (specify) \_\_\_\_\_
10. Occupation: 1= Nomadic pastoralist 2= Agro-pastoralist 3= farmer 4= Business  
5= Civil servant 6= student 7= other (specify) \_\_\_\_\_
11. Do you migrate in dry Seasons?  
1= Yes 2= No

## Part II. Assessments of knowledge about PTB

1. Have you ever heard about the disease called PTB?

1= Yes

2= No

2. If yes, from whom mainly?

1= from friend (s)

2= From health workers /Health extension workers

3= From media

(radio, TV poster etc)

4= from patient 5= family

3. member/friends 6= Other (specify): \_\_\_\_\_

4. What do you think is the cause of PTB? (Check all that are mentioned)

1= Bacteria/germ

2= witchcraft

3= shortage of food

4= unventilated house

5= Sexual overindulgence

6= hard work

7= poverty

8= living together with untreated

TB patient

9= Cold air

10= others (specify): \_\_\_\_\_

5. What are some of the common symptoms of TB? (Check all that are mentioned)

1= cough

2= Cough for 2 or more weeks

3= cough up blood

4= weight loss

5= shortness of breath

6= Fever/sweat at night

6= chest pain

7= weakness or loss of

appetite

8= rash

9= other (Specify) \_\_\_\_\_

10= do not know

6. Do you know that TB can be transmitted?

1= Yes

2= No

7. If yes to Q7, How can TB be transmitted from person to person ? (Check all that are mentioned)

1= through droplets from coughing or sneezing of a person having TB

2= hand shaking of a person having TB

3= kissing TB infected person

4= drinking raw milk      5= eating TB infected meat

6= exposure to cold air      7= sharing cup with a person having TB

8= sharing utensils      9= chewing chat together

10= Others (specify) : \_\_\_\_\_

8. Who do you think can transmit TB? (Check all that are mentioned)

1= a person who have active TB and not taking TB drugs

2= Anyone who has cough

3= a person who is diagnosed having TB and finished treatment

4= others specify

9. Do you think that the transmission of PTB can be prevented?

1= Yes      2= No

10. If Yes to Q12, How can TB be prevented (Check all that are mentioned)

1= using separate room      2= covering mouth and nose while coughing or sneezing

3= avoiding sharing cups      4= avoiding eating raw meat

5= avoiding drinking raw milk      6= through good nutrition

7= by prayer                      8= others (specify):\_\_\_\_\_

11. In your opinion, who can be infected with TB? (Check all that are mentioned)

1= anybody    2= Poor people    3= homeless people    4= only alcoholics

5= only people living with HIV    6= Others (specify): \_\_\_\_\_

12. Can TB be cured?

1= Yes            2= No

13. If Yes to Q15, How can someone with TB be cured? (Check all that are mentioned)

1= traditional Medicine            2= home rest without medicine    3=praying

4= specific drugs given by health facility    5= DOTS

6= do not Know    7= others (specify): \_\_\_\_\_

14. Do you know that the drugs are available for free?

1= Yes            2= No            3= I don't know

### **Part III: presumptive TB case identification and referral practice of traditional healers**

1. Have you ever seen a person with signs and symptoms of TB in the last one year?

1=Yes            2=No

2. If yes, have you ever referred a person with symptoms of TB to healthcare facilities?

1=Yes            2=No

3. If yes how many people with presumptive TB symptoms did you refer? Please specify:\_\_\_\_\_

4. Have you heard back from the patients you referred after their visit to health facilities?

1=Yes                      2=No

5. If yes, what was their status after visiting healthcare facility?

1= non TB cases: \_\_\_\_\_

2= sputum examined and confirmed TB cases: \_\_\_\_\_

3= treatment completed: \_\_\_\_\_

4= on treatment: \_\_\_\_\_

5= lost to follow up: \_\_\_\_\_

6= other, please specify: \_\_\_\_\_

6. Are you still referring presumptive TB cases to healthcare facilities?

1=Yes                      2=No

7. Are you willing to refer presumptive TB cases in the future?

1= Yes                      2=No
